# Supplementary material for: Tidal variation modulates the dissolved silicate behavior and exchange flux across the semi-enclosed bay‐coastal water continuum, China
Source: Frontiers journal article supplement (doi:10.3389/fmars.2023.1229267), 2023-09-01
Supplement: Data_Sheet_1.xlsx [file Data_Sheet_1.xlsx]

## Sheet: SDB digital
Location	date	sampling time	site	flow velocity	direction of flow (due north is 0°)	tide height(cm)	DSi
				cm/s			μmol/L
Shuidong Bay	2021-08-22	10:00:00	S1	8.279	217.775	354	42.517
Shuidong Bay	2021-08-22	13:00:00	S1	6.8899	56.8442	228	36.4751
Shuidong Bay	2021-08-22	17:00:00	S1	9.3915	37.7325	35	64.4468
Shuidong Bay	2021-08-22	20:00:00	S1	11.1385	200.542	111	52.5868
Shuidong Bay	2021-08-22	23:00:00	S1	7.4459	226.717	230	84.3627
Shuidong Bay	2021-08-23	02:00:00	S1	8.796	65.7187	159	49.9015
Shuidong Bay	2021-08-23	04:00:00	S1	9.9582	29.319	109	82.7963
Shuidong Bay	2021-08-23	08:00:00	S1	12.272	226.648	237	70.0412
Shuidong Bay	2021-08-23	10:00:00	S1	10.0075	227.118	340	75.8593
Shuidong Bay	2021-08-22	10:00:00	S2	11.3033	225.601	354	4.47547
Shuidong Bay	2021-08-22	13:00:00	S2	45.4856	95.1879	228	7.83208
Shuidong Bay	2021-08-22	17:00:00	S2	4.9894	129.322	35	73.174
Shuidong Bay	2021-08-22	20:00:00	S2	20.8609	264.05	111	27.3004
Shuidong Bay	2021-08-22	23:00:00	S2	30.9972	259.848	230	23.9438
Shuidong Bay	2021-08-23	02:00:00	S2	23.6348	95.7264	159	21.4823
Shuidong Bay	2021-08-23	04:00:00	S2	18.5952	75.4273	109	108.306
Shuidong Bay	2021-08-23	08:00:00	S2	51.8402	258.128	237	14.7691
Shuidong Bay	2021-08-23	10:00:00	S2	31.4132	269.741	340	16.3355
Shuidong Bay	2021-08-22	10:00:00	S3	21.7839	319.432	354	7.16076
Shuidong Bay	2021-08-22	13:00:00	S3	92.8821	144.154	228	6.93699
Shuidong Bay	2021-08-22	17:00:00	S3	6.4964	144.254	35	44.3072
Shuidong Bay	2021-08-22	20:00:00	S3	23.8273	336.034	111	31.1045
Shuidong Bay	2021-08-22	23:00:00	S3	24.4922	329.419	230	8.05585
Shuidong Bay	2021-08-23	02:00:00	S3	44.1116	146.542	159	28.1955
Shuidong Bay	2021-08-23	04:00:00	S3	19.3634	138.772	109	35.3562
Shuidong Bay	2021-08-23	08:00:00	S3	65.7916	327.264	237	15.2166
Shuidong Bay	2021-08-23	10:00:00	S3	61.2942	323.472	340	17.4544
Shuidong Bay	2021-08-22	10:00:00	S4	25.6488	289.853	354	8.05585
Shuidong Bay	2021-08-22	13:00:00	S4	56.6515	155.229	228	15.6642
Shuidong Bay	2021-08-22	17:00:00	S4	7.2325	217.966	35	11.6362
Shuidong Bay	2021-08-22	20:00:00	S4	32.3217	327.712	111	8.95095
Shuidong Bay	2021-08-22	23:00:00	S4	39.0397	335.876	230	11.6362
Shuidong Bay	2021-08-23	02:00:00	S4	21.7633	144.245	159	10.5174
Shuidong Bay	2021-08-23	04:00:00	S4	18.6143	143.576	109	6.93699
Shuidong Bay	2021-08-23	08:00:00	S4	46.9859	333.837	237	11.1887
Shuidong Bay	2021-08-23	10:00:00	S4	36.918	334.042	340	17.2306
Shuidong Bay	2021-08-29	09:25:00	S1	3.938	173.328	130	117.705
Shuidong Bay	2021-08-29	11:00:00	S1	4.2784	175.387	149	89.2857
Shuidong Bay	2021-08-29	14:26:00	S1	5.2316	226.531	215	85.7053
Shuidong Bay	2021-08-29	20:00:00	S1	4.8681	94.2963	128	141.649
Shuidong Bay	2021-08-29	1900-01-01	S1	1.9637	145.933	192	105.621
Shuidong Bay	2021-08-30	02:35:00	S1	2.8569	215.223	246	129.565
Shuidong Bay	2021-08-30	04:00:00	S1	6.3353	51.5633	257	137.621
Shuidong Bay	2021-08-30	06:00:00	S1	6.9965	53.0673	205	118.153
Shuidong Bay	2021-08-30	09:23:00	S1	4.9678	230.128	136	153.956
Shuidong Bay	2021-08-29	09:25:00	S2	7.5214	253.623	130	34.9087
Shuidong Bay	2021-08-29	11:00:00	S2	10.0405	236.249	149	13.874
Shuidong Bay	2021-08-29	14:26:00	S2	12.6464	261.335	215	5.81812
Shuidong Bay	2021-08-29	17:00:00	S2	23.0193	83.0507	190	30.8808
Shuidong Bay	2021-08-29	20:00:00	S2	8.6203	72.3199	128	59.3
Shuidong Bay	2021-08-29	1900-01-01	S2	11.5611	258.082	192	15.2166
Shuidong Bay	2021-08-30	02:35:00	S2	8.5865	286.022	246	8.5034
Shuidong Bay	2021-08-30	06:00:00	S2	35.5811	83.2211	205	93.3136
Shuidong Bay	2021-08-30	09:23:00	S2	8.865	73.161	136	140.53
Shuidong Bay	2021-08-29	09:25:00	S3	19.7144	342.579	130	19.0208
Shuidong Bay	2021-08-29	11:00:00	S3	18.2686	266.341	149	6.04189
Shuidong Bay	2021-08-29	14:26:00	S3	22.8796	328.431	215	34.6849
Shuidong Bay	2021-08-29	17:00:00	S3	37.0255	155.802	190	16.3355
Shuidong Bay	2021-08-29	20:00:00	S3	7.7116	182.355	128	14.0977
Shuidong Bay	2021-08-29	1900-01-01	S3	31.8349	327.238	192	9.3985
Shuidong Bay	2021-08-30	02:35:00	S3	16.2426	326.484	246	36.2513
Shuidong Bay	2021-08-30	06:00:00	S3	44.7543	145.955	205	50.5729
Shuidong Bay	2021-08-30	09:23:00	S3	11.5532	146.348	136	56.6148
Shuidong Bay	2021-08-29	09:25:00	S4	26.8571	322.388	130	22.1536
Shuidong Bay	2021-08-29	11:00:00	S4	27.8397	328.674	149	8.5034
Shuidong Bay	2021-08-29	14:26:00	S4	24.6081	330.056	215	12.9789
Shuidong Bay	2021-08-29	17:00:00	S4	27.8678	148.695	190	8.95095
Shuidong Bay	2021-08-29	20:00:00	S4	14.0423	138.645	128	8.95095
Shuidong Bay	2021-08-29	1900-01-01	S4	31.6609	333.07	192	20.811
Shuidong Bay	2021-08-30	02:35:00	S4	25.5016	332.746	246	15.4404
Shuidong Bay	2021-08-30	06:00:00	S4	35.2964	143.026	205	24.3913
Shuidong Bay	2021-08-30	09:23:00	S4	13.3209	168.783	136	6.48944

## Sheet: fluxes
location	date	sampling time	site	depth	flow velocity	Width of the Bay Estuary	direction of flow(due north is 0°)	tide height	quantity of flow	DSi	DSi
				m	cm/s	m			L/h	mg/L	t/h
Shuidong Bay	2021-08-22	10:00:00	7	7.8	25.6488	500	289.853	354	3601091520	0.225564	0.812276
Shuidong Bay	2021-08-22	11:00:00	7	7.8	57.1715	500	139.67	342	-8026878600	0.225564	-1.81057
Shuidong Bay	2021-08-22	12:00:00	7	7.8	57.8884	500	140.738	297	-8127531360	0.438596	-3.56471
Shuidong Bay	2021-08-22	13:00:00	7	7.8	56.6515	500	155.229	228	-7953870600	0.438596	-3.48854
Shuidong Bay	2021-08-22	14:00:00	7	7.8	61.0969	500	145.817	155	-8578004760	0.438596	-3.76228
Shuidong Bay	2021-08-22	15:00:00	7	7.8	71.0048	500	146.618	94	-9969073920	0.382206	-3.81024
Shuidong Bay	2021-08-22	16:00:00	7	7.8	33.5251	500	146.516	53	-4706924040	0.325815	-1.53358
Shuidong Bay	2021-08-22	17:00:00	7	7.8	7.2325	500	217.966	35	-1015443000	0.325815	-0.330846
Shuidong Bay	2021-08-22	18:00:00	7	7.8	18.9144	500	326.96	41	2655581760	0.325815	0.865227
Shuidong Bay	2021-08-22	19:00:00	7	7.8	15.9494	500	331.326	67	2239295760	0.250627	0.561227
Shuidong Bay	2021-08-22	20:00:00	7	7.8	32.3217	500	327.712	111	4537966680	0.250627	1.13734
Shuidong Bay	2021-08-22	21:00:00	7	7.8	47.847	500	326.902	162	6717718800	0.250627	1.68364
Shuidong Bay	2021-08-22	22:00:00	7	7.8	58.3014	500	330.387	206	8185516560	0.325815	2.66696
Shuidong Bay	2021-08-22	23:00:00	7	7.8	39.0397	500	335.876	230	5481173880	0.325815	1.78585
Shuidong Bay	2021-08-22	1900-01-01	7	7.8	20.627	500	143.949	226	-2896030800	0.325815	-0.943569
Shuidong Bay	2021-08-23	01:00:00	7	7.8	23.6595	500	165.744	198	-3321793800	0.294486	-0.978222
Shuidong Bay	2021-08-23	02:00:00	7	7.8	21.7633	500	144.245	159	-3055567320	0.294486	-0.899822
Shuidong Bay	2021-08-23	03:00:00	7	7.8	25.9905	500	158.007	126	-3649066200	0.244361	-0.891689
Shuidong Bay	2021-08-23	04:00:00	7	7.8	18.6143	500	143.576	109	-2613447720	0.194236	-0.507625
Shuidong Bay	2021-08-23	05:00:00	7	7.8	18.141	500	297.196	113	2546996400	0.194236	0.494717
Shuidong Bay	2021-08-23	06:00:00	7	7.8	40.3012	500	329.559	138	5658288480	0.253759	1.43584
Shuidong Bay	2021-08-23	07:00:00	7	7.8	56.3208	500	329.351	181	7907440320	0.313283	2.47727
Shuidong Bay	2021-08-23	08:00:00	7	7.8	46.9859	500	333.837	237	6596820360	0.313283	2.06667
Shuidong Bay	2021-08-23	09:00:00	7	7.8	49.9801	500	332.654	295	7017206040	0.39787	2.79193
Shuidong Bay	2021-08-23	10:00:00	7	7.8	36.918	500	334.042	340	5183287200	0.482456	2.50071
										0.316764
Shuidong Bay	2021-08-29	09:25:00	7	7.8	26.8571	500	322.388	130	3770736840	0.620301	2.33899
Shuidong Bay	2021-08-29	11:00:00	7	7.8	27.8397	500	328.674	149	3908693880	0.238095	0.930641
Shuidong Bay	2021-08-29	12:00:00	7	7.8	30.0277	500	328.355	173	4215889080	0.238095	1.00378
Shuidong Bay	2021-08-29	13:00:00	7	7.8	33.87	500	341.542	197	4755348000	0.363409	1.72813
Shuidong Bay	2021-08-29	14:26:00	7	7.8	24.6081	500	330.056	215	3454977240	0.363409	1.25557
Shuidong Bay	2021-08-29	15:00:00	7	7.8	18.8131	500	171.628	222	-2641359240	0.363409	-0.959892
Shuidong Bay	2021-08-29	16:00:00	7	7.8	43.3712	500	145.822	213	-6089316480	0.250627	-1.52614
Shuidong Bay	2021-08-29	17:00:00	7	7.8	27.8678	500	148.695	190	-3912639120	0.250627	-0.980611
Shuidong Bay	2021-08-29	18:00:00	7	7.8	16.0241	500	130.595	163	-2249783640	0.250627	-0.563856
Shuidong Bay	2021-08-29	19:00:00	7	7.8	21.4824	500	148.563	140	-3016128960	0.250627	-0.755922
Shuidong Bay	2021-08-29	20:00:00	7	7.8	14.0423	500	138.645	128	-1971538920	0.250627	-0.49412
Shuidong Bay	2021-08-29	21:00:00	7	7.8	23.0761	500	324.785	127	3239884440	0.250627	0.812001
Shuidong Bay	2021-08-29	22:00:00	7	7.8	41.9248	500	335.342	139	5886241920	0.416667	2.4526
Shuidong Bay	2021-08-29	23:00:00	7	7.8	30.4911	500	333.701	162	4280950440	0.582707	2.49454
Shuidong Bay	2021-08-29	1900-01-01	7	7.8	31.6609	500	333.07	192	4445190360	0.582707	2.59024
Shuidong Bay	2021-08-30	01:00:00	7	7.8	28.653	500	334.619	221	4022881200	0.507519	2.04169
Shuidong Bay	2021-08-30	02:35:00	7	7.8	25.5016	500	332.746	246	3580424640	0.432331	1.54793
Shuidong Bay	2021-08-30	03:00:00	7	7.8	12.5556	500	157.36	259	-1762806240	0.432331	-0.762115
Shuidong Bay	2021-08-30	04:00:00	7	7.8	25.9186	500	146.203	257	-3638971440	0.557644	-2.02925
Shuidong Bay	2021-08-30	05:00:00	7	7.8	33.448	500	146.437	236	-4696099200	0.682957	-3.20724
Shuidong Bay	2021-08-30	06:00:00	7	7.8	35.2964	500	143.026	205	-4955614560	0.682957	-3.38447
Shuidong Bay	2021-08-30	07:00:00	7	7.8	30.374	500	143.988	174	-4264509600	0.682957	-2.91248
Shuidong Bay	2021-08-30	08:00:00	7	7.8	5.9429	500	149.434	150	-834383160	0.181704	-0.151611
Shuidong Bay	2021-08-30	09:23:00	7	7.8	13.3209	500	168.783	136	-1870254360	0.181704	-0.339833
Shuidong Bay	2021-08-30	10:00:00	7	7.8	9.4712	500	184.463	132	-1329756480	0.181704	-0.241622
										0.400306
							spring tide day net exchange flux				-1.24204
							neap tide day net exchange flux				0.88695
							mid-tide day net exchange flux				-0.177545
